# Supplementary material for: Rate of adherence to urate-lowering therapy among patients with gout: a systematic review and meta-analysis
Source: PubMed Central journal article supplement — BMJ Open. 2018 Apr 10;8(4):e017542. doi: 10.1136/bmjopen-2017-017542 (PMC5898304; doi:10.1136/bmjopen-2017-017542), 2018-04-10
Supplement: bmjopen-2017-017542supp001.pdf [file bmjopen-2017-017542supp001.pdf]

## **Additional file 1: Search strategy**

PubMed/Web of Science:

(adherence OR compliance) AND urate-lowering therapy AND gout
